# Supplementary material
Source: PubMed Central journal article supplement (PMC4989382)
Supplement: supp_deu030_deu030_suppl_table2.pdf [file supp_deu030_deu030_suppl_table2.pdf]

**Supplementary Table II** Ongoing pregnancy rate: summary statistics, Intent-to-Treat (ITT) and Per Protocol (PP) group.

|                   |                     | Previously Published Results             |                                       |                                          |                                       | Corrected Results                        |                                       |                                          |                                       |
|-------------------|---------------------|------------------------------------------|---------------------------------------|------------------------------------------|---------------------------------------|------------------------------------------|---------------------------------------|------------------------------------------|---------------------------------------|
|                   |                     | ITT                                      |                                       | PP                                       |                                       | ITT                                      |                                       | PP                                       |                                       |
|                   |                     | 150 µg Org 36286<br>(N = 756)<br>N n (%) | 200 IU recFSH<br>(N = 750)<br>N n (%) | 150 µg Org 36286<br>(N = 739)<br>N n (%) | 200 IU recFSH<br>(N = 733)<br>N n (%) | 150 µg Org 36286<br>(N = 756)<br>N n (%) | 200 IU recFSH<br>(N = 750)<br>N n (%) | 150 µg Org 36286<br>(N = 739)<br>N n (%) | 200 IU recFSH<br>(N = 733)<br>N n (%) |
| Ongoing pregnancy | Per attempt         | 756 294 (38.9)                           | 750 286 (38.1)                        | 739 291 (39.4)                           | 733 282 (38.5)                        | 756 <b>295 (39.0)</b>                    | 750 286 (38.1)                        | 739 <b>292 (39.5)</b>                    | 733 282 (38.5)                        |
|                   | Per embryo transfer | 672 294 (43.8)                           | 704 286 (40.6)                        | 659 291 (44.2)                           | 687 282 (41.0)                        | 672 <b>295 (43.9)</b>                    | 704 286 (40.6)                        | 659 <b>292 (44.3)</b>                    | 687 282 (41.0)                        |

n = number of subjects with an ongoing pregnancy, i.e. with at least one fetus with heart activity at least 10 weeks after ET; N = the total number of subjects.
