# Supplementary material
Source: PubMed Central journal article supplement (PMC4989382)
Supplement: supp_deu030_deu030_suppl_table3.pdf [file supp_deu030_deu030_suppl_table3.pdf]

**Supplementary Table III** Number of cumulus-oocyte-complexes: summary statistics, Intent-to-Treat (ITT) and Per Protocol (PP) group.

|                                                  |                | Previously Published Results     |                               |                                  |                               | Corrected Results                |                               |                                  |                               |
|--------------------------------------------------|----------------|----------------------------------|-------------------------------|----------------------------------|-------------------------------|----------------------------------|-------------------------------|----------------------------------|-------------------------------|
|                                                  |                | ITT                              |                               | PP                               |                               | ITT                              |                               | PP                               |                               |
|                                                  |                | 150 µg Org<br>36286<br>(N = 756) | 200 IU<br>recFSH<br>(N = 750) | 150 µg Org<br>36286<br>(N = 739) | 200 IU<br>recFSH<br>(N = 733) | 150 µg Org<br>36286<br>(N = 756) | 200 IU<br>recFSH<br>(N = 750) | 150 µg Org<br>36286<br>(N = 739) | 200 IU<br>recFSH<br>(N = 733) |
| Number of cumulus-oocytes-complexes, per attempt | n              | 756                              | 750                           | 739                              | 733                           | 756                              | 750                           | 739                              | 733                           |
|                                                  | Mean (SD)      | 13.7 (8.2)                       | 12.5 (6.7)                    | 13.7 (8.2)                       | 12.6 (6.8)                    | <b>13.8 (8.3)</b>                | <b>12.6 (6.8)</b>             | <b>13.8 (8.3)</b>                | 12.6 (6.8)                    |
|                                                  | Median (range) | 13.0 (0, 65)                     | 12.0 (0, 39)                  | 13.0 (0, 65)                     | 12.0 (0, 39)                  | 13.0 (0, 65)                     | 12.0 (0, <b>40</b> )          | 13.0 (0, 65)                     | 12.0 (0, <b>40</b> )          |
| Number of cumulus-oocytes-complexes, per stage * | n              | 732                              | 742                           | 716                              | 725                           | 732                              | 742                           | 716                              | 725                           |
|                                                  | Mean (SD)      | 14.1 (7.9)                       | 12.7 (6.7)                    | 14.2 (8.0)                       | 12.7 (6.7)                    | <b>14.2 (8.0)</b>                | 12.7 (6.7)                    | 14.2 (8.0)                       | <b>12.8 (6.7)</b>             |
|                                                  | Median (range) | 13.0 (0, 65)                     | 12.0 (0, 39)                  | 13.0 (0, 65)                     | 12.0 (0, 39)                  | 13.0 (0, 65)                     | 12.0 (0, <b>40</b> )          | 13.0 (0, 65)                     | 12.0 (0, <b>40</b> )          |

\* = Restricted to subjects with oocyte retrieval. n = the number of subjects with data; N = the total number of subjects.
